1 **Microvascular dysfunction induces a hyperdynamic circulation; a mathematical exploration**

2 Ivor Popovich, MBChB

3 [ivor.popovich@xtra.co.nz](mailto:ivor.popovich@xtra.co.nz)

4 Intensive Care Auckland Region, New Zealand

5 100 Hospital Road, Mangere East, Auckland

6

7

8

9

10

11

12

13

14

15

16

17

18

19

20

21

22

23

24

25

26

27

28

29

30

31 **NOTE: This preprint reports new research that has not been certified by peer review and should not be used to guide clinical practice.**

32 Abstract

33 Background: The discordance between the macrocirculation and microcirculation in septic shock has  
34 been recognised but never explained. I present a novel mathematical hypothesis as to how  
35 heterogenous microcirculatory flow distribution directly induces a hyperdynamic circulation and  
36 how elevated central venous pressure induces microcirculatory dysfunction.

37 Methods: I explore the tube law and modified Poiseuille resistance for compliant blood vessels.  
38 Using these equations a new equation is developed incorporating time constants, elastance of the  
39 vessel, unstressed volume and wave reflections that demonstrates the relationship between volume  
40 of a microcirculatory vessel and total flow through it.

41 Results: The relationship is demonstrated to be constant at zero until the unstressed volume is  
42 reached after which it increases exponentially. By considering  $n$  of these vessels in parallel, I  
43 demonstrate that the summed flow is minimised when flow is equally distributed among the  $n$   
44 vessels, while it is maximised when all flow goes through one vessel alone, thereby demonstrating  
45 that heterogenous microvascular perfusion leads to increased total flow. It is shown that if  
46 conditions of wave reflection are right then a hyperdynamic circulation with high cardiac output  
47 develops. It is also demonstrated that high central venous pressure increases wave reflections and  
48 necessarily leads to microvascular perfusion heterogeneity if cardiac output is to be maintained.

49 Conclusions: Microvascular impairment in septic shock directly leads to a hyperdynamic circulation  
50 with high cardiac output. High central venous pressures impair the microcirculation. Decades of  
51 clinical findings can now be explained mathematically. Implications for hemodynamic therapy for  
52 septic shock are discussed.

53

54

55

56

57

58

59

60

61

62

63

64

65

66

67

68

69 Clinical Perspective

70 Research in septic shock has focussed on two main components of the circulation; the  
71 macrocirculation and microcirculation. Very discordant findings have been observed between the  
72 two, to the point that the term ‘uncoupling’ has appeared in the literature in reference to these two  
73 circulations. Thus far nobody has put forward a satisfactory physiological explanation as to the  
74 mechanism of this discordance. There is a need to understand the physiological mechanisms to  
75 guide future attempts and research into methods of resuscitating the septic patient in order to  
76 improve circulatory function.

77 This work provides the first theoretical mathematical groundwork as to not only how these  
78 circulations are linked, but how they directly influence one another. This sets the framework for  
79 future clinical and basic science research and helps us understand how our current resuscitation  
80 strategies may work to restore the microcirculation, and when they may start to impair it.

81

82

83

84

85

86

87

88

89

90

91

92

93

94

95

96

97

98

99

100

101

102

## 103 Introduction

104 The aim of resuscitating the shocked patient is to restore cellular oxygen delivery and energy  
105 utilisation by restoring cellular blood flow (1). The adequacy of the circulation in this regard can be  
106 assessed using either 'macrocirculatory' or 'microcirculatory' variables. The former consists of things  
107 easily measured in clinical practice that reflect global oxygen delivery i.e. heart rate, cardiac output,  
108 blood pressure, and central venous pressure. The latter is difficult to measure at the bedside and  
109 includes parameters only used in research studies, such as the functional capillary density and  
110 perfused vessel density (2). While assessment of the microcirculation is the more important of the  
111 two, as it most closely reflects the end points of resuscitation, it is generally believed that optimising  
112 macrocirculatory parameters will optimise the microcirculation.

113 Increasing evidence has accumulated that this is not the case. It is now well-known that in septic  
114 shock without concurrent hypovolemia that a hyperdynamic (high cardiac output) circulation  
115 develops, however severe microcirculatory derangements persist and are directly associated with  
116 mortality. These consist of reduced vessel density and heterogeneous flow distribution. Organ  
117 dysfunction develops despite elevated organ blood flows (3-6). The nature of these paradoxical  
118 findings has never been fully explained. Traditional resuscitation paradigms have focussed on fluid  
119 resuscitation to increase central venous pressure (CVP) in order to further increase cardiac output  
120 and organ perfusion. Recently, it has been shown in sepsis that a high central venous pressure,  
121 independently of other hemodynamic variables, impairs organ function, particularly renal function  
122 (7). This adds to identical findings in another group of patients, those with chronic heart failure,  
123 where the association is also independent of cardiac output (8).

124 The aim of this study is to put forward a mathematical explanation as to how the macrocirculation  
125 and microcirculation are linked and to explain why elevated central venous pressures may impair the  
126 microcirculation despite being associated with improved global hemodynamics.

127

## 128 Methods (*Mathematical background*)

129 Understanding the novel mathematics in this paper requires us to explain some existing concepts.  
130 The circulation is composed of travelling flow (Q) and pressure (P) waves. At any given anatomical  
131 location in the circulation the relationship between the magnitude and shape of the pressure and  
132 flow waves is determined by the impedance (Z). The equation relating the two is;

$$133 \quad (1) \quad P = QZ$$

134 P and Q are wave functions and Z is a complex number (i.e. it contains both real and imaginary parts)  
135 and multiplying Q by Z is not a straightforward exercise. However we can simplify this greatly by  
136 considering only the mean pressure and flow, which is what we are interested in, rather than the  
137 whole wave. In doing this Z reduces to a real function which is easy to multiply.

138 A problem is encountered however as we pass along the circulation; the impedance changes.  
139 Imagine a junction between 2 segments of the circulation. Impedance of the upstream segment is  $Z_1$   
140 and the impedance of the downstream segment is  $Z_2$ . At the junction the flow and pressure are the  
141 same yet there are two different values of Z. Mother nature solves this paradox by reflecting some  
142 of the upstream waves back at the junction (9). Thereby each segment of the circulation contains  
143 both a forward and backward travelling wave, and therefore a forward and reverse mean flow. The  
144 net flow is the same in each segment and results from subtracting the reverse flow from the forward  
145 flow.

146 (2)  $Q = Q_f - Q_r$

147 Where Q is the net flow,  $Q_f$  is the forward flow and  $Q_r$  is the reverse flow.

148 In contrast the forward and reverse pressures are additive;

149 (3)  $P = Z_1(Q_f + Q_r)$

150 This allows each segment to maintain its own Z, while allowing the net flow and net pressure at the  
151 junction to be equal between them. For example, the upstream segment may have a forward flow of  
152 5 L/min and a reverse flow of 2 L/min, while the downstream segment may have a single forward  
153 flow of 3 L/min. In both cases the net flow is the same. In fact the size of the reverse flow relative to  
154 the forward flow (C), assuming that the downstream segment does not have any reflected waves of  
155 its own, can be defined as follows;

156 (4)  $C = \frac{Z_2 - Z_1}{Z_2 + Z_1}$

157 The mathematical derivation of this is straightforward (10) and not reproduced here. The  
158 downstream segment in fact does have reflected waves of its own (from a segment even further  
159 downstream from itself) so the equation is not quite so simple. However the same principle remains;  
160 the greater the impedance of a downstream segment compared to the impedance of the upstream  
161 segment, the stronger the reflected waves. This is the same principle that governs the clinical utility  
162 of ultrasound waves.

163 Now we must turn our attention to understanding the nature of the compliant segments of the  
164 circulation. The circulation is simplified for the benefit of clinicians' understanding into a linear  
165 model. Linearity means that the flow through a vessel does not affect the characteristics of the  
166 vessel. Taking a stiff artery, and assuming that the vascular tone of the artery remains constant,  
167 doubling the flow through said artery will not change the volume of blood in the artery, its  
168 compliance, nor its resistance. A doubling of flow leads to a doubling of the pressure gradient.  
169 However in the microcirculation, composed of arterioles, capillaries and venules, this is not the case  
170 (11). Haemodynamics here are highly non-linear. Because the microcirculation (in particular the  
171 venules) is highly compliant, increasing flow through it will increase its volume, which will decrease  
172 its resistance, and the resultant change in the pressure gradient is not easily predictable.

173 The importance of these observations has already been recognised in the venous function work of  
174 Guyton and other authors who have followed on from this (12). The venous system is recognised as  
175 having an unstressed volume, which does not generate any pressure in the veins. Anything above  
176 this volume is the stressed volume, which begins to generate pressure and therefore venous return.  
177 Increasing venous return increases the preload available to the heart, which will respond by  
178 increasing its cardiac output (in the long run venous return and cardiac output are the same) (13).  
179 The stressed volume can either be increased by fluid or blood infusion, or by catecholamine induced  
180 increases in venous tone, the latter decreasing the venous compliance and the unstressed volume.

181

## 182 Results (*Mathematical development*)

183 The pressure-volume relationship of veins has been extensively modelled in the works of Pedley et  
184 al. (14-15). The same principle can be applied to the other compliant/non-linear vessels of the  
185 microcirculation. Pressure as a function of volume of a vessel segment is described with the  
186 following equation;

187 
$$(5) P(v) = K \left( \left( \frac{v}{v_0} \right)^m - \left( \frac{v}{v_0} \right)^n \right)$$

188 This is known as the tube law.

189 P is the transmural pressure, although we assume the external pressure to be zero, so the internal  
190 pressure equals the transmural pressure. K is a constant, v is the volume of the vessel segment, v<sub>0</sub> is  
191 the unstressed volume, m is some positive integer and n is some negative integer.

192 In a non-compliant tube the resistance is described by the traditional Poiseuille equation. This is  
193 inadequate for modelling the resistance in compliant vessels. As the volume and/or transmural  
194 pressure of a compliant vessel decreases, the vessel undergoes partial collapse. The shape of the  
195 cross-sectional area changes from tubular to elliptical, which imparts greater viscous resistance to  
196 the tube. Thankfully Pedley has derived a modified Poiseuille equation to account for this behaviour  
197 (14). Resistance as a function of volume is described by;

198 
$$(6) R(v) = \frac{8\pi\mu l}{\left(\frac{v}{v_0}\right)^{2+a} \left(\frac{v_0}{l}\right)^2}$$

199 R is the resistance of the vessel segment, μ is the viscosity, l is the length of the segment (assumed  
200 to remain constant), and a is some positive integer (0.5 was the value used by Pedley et al. (14)).

201 There are other assumptions inherent in using the modified Poiseuille equation to model resistance.  
202 Firstly flow must be laminar and secondly the fluid involved must be Newtonian. Blood is known to  
203 be non-Newtonian, meaning that its viscosity falls as its shear stress increases. Turbulent blood flow  
204 also occurs in parts of the circulation, although in the microcirculation Reynolds numbers have been  
205 found to be in the range indicating laminar flow (16). Either way these assumptions produce only  
206 minor deviations from observed values and are acceptable in modelling the circulation (17).

207 All distensible tubes with both a compliance and a resistance that either empty or fill with flow will  
208 exhibit a time constant τ. Such a tube will empty at an initial rate that then decreases in an  
209 exponential fashion with time, until the tube has completely emptied. The time constant represents  
210 the time that would be required for the system to empty to zero if emptying had continued at that  
211 initial rate (18). Therefore the initial flow rate of emptying in units of volume per time is;

212 
$$(7) Q_e = \frac{v}{\tau}$$

213 Q<sub>e</sub> is the initial flow rate of emptying and v is the initial volume.

214 Usefully, the time constant is determined by the elastance and resistance of the tube.

215 
$$(8) \tau = \frac{R}{E}$$

216 E is elastance. The elastance of a distensible tube segment is simply the derivative of its pressure  
217 with respect to volume. Therefore;

218 
$$(9) E(v) = \frac{dP}{dv} = \frac{K \left( m \left( \frac{v}{v_0} \right)^{m-1} - n \left( \frac{v}{v_0} \right)^{n-1} \right)}{v_0}$$

219 Eq. 9 is simply the first derivative of Eq. 5.

220 When the circulatory system is in steady state the mean volume of a compliant tube segment is  
221 constant. Therefore the rate of emptying of the tube segment equals the inflow into the segment.

222 Since the segment is not changing volume, the emptying rate continues at the initial rate. We know  
 223 the elastance and resistance of the tube segment, therefore;

$$224 \quad (10) \quad Q_t(v) = Q_e(v) = \frac{\frac{v}{v_0} K \left( m \left( \frac{v}{v_0} \right)^{m-1} - n \left( \frac{v}{v_0} \right)^{n-1} \right) \left( \frac{v}{v_0} \right)^{2+\alpha} v_0^2}{8\pi\mu l^3}$$

225  $Q_t$  is both the inflow and outflow and therefore the total flow through the segment. This is where we  
 226 need to recall the forward and reverse wave phenomena covered in the previous section. The tube  
 227 segment both empties and fills in both the forward and reverse directions. Therefore;

$$228 \quad (11) \quad Q_t = Q_f + Q_r$$

229 If we plot Eq. 10 we observe the following (Fig 1.).

230 We see that as the tube fills with volume this does not generate any flow at first until it reaches a  
 231 critical volume, after which flow starts to rise exponentially. By choosing an appropriately small  
 232 value for K in the equation, this critical volume becomes  $v_0$ . The difference between the red curve  
 233 and the green curve is that  $v_0$  has been decreased in the red curve.

234 That  $Q_t$  is the summation of both the forward and reverse mean flow may be difficult for some  
 235 readers to accept. We can see however how it is consistent with our clinical observations. If the  
 236 generated flow was only the net forward flow then we would expect an increase in volume of  
 237 compliant vessels to always result in an increased cardiac output. However in a failing heart a large  
 238 volume may exist in the venous circulation despite a low cardiac output; in this case the reverse flow  
 239 is large, so  $Q_t$  remains high, however the net forward flow is low.

240 Now let us consider the vascular bed of a single organ. Considering the microvascular, compliant  
 241 portion, we have a bed made up of  $\eta$  vessel segments in parallel, each represented by Eq. 10. Since  
 242 they exist in the same bed, let us assume they are identical in all the constants in Eq. 10. That is, the  
 243 only thing that changes between them is their volume. The  $Q_t$  of that organ bed as a whole will be  
 244 the summation of  $Q_t$  in the  $\eta$  vessel segments.

$$245 \quad (12) \quad Q_{t_{organ}} = Q_t = \sum_{i=1}^{\eta} Q_{t_i}$$

246 Any organ bed will contain a given total volume, which we will call B, which can be distributed  
 247 amongst the  $\eta$  vessel segments in any combination. The pattern of volume distribution will therefore  
 248 affect the total  $Q_t$ . For example, to take an extreme hypothetical, if there are two total vessel  
 249 segments, the total flow will be different if the total volume is distributed evenly amongst them  
 250 compared to if all the volume is contained in only one of the vessel beds. In fact the total flow can be  
 251 described with the following equation;

$$252 \quad (13) \quad Q_t(B) = f(B - k_1) + f(k_1 - k_2) + f(k_2 - k_3) + \dots + f(k_{\eta-2} - k_{\eta-1}) + f(k_{\eta-1})$$

253 We use the notation  $f()$  for the simplification of the math that is to follow to represent each  $Q_{t_i}(v)$ ,  
 254 or the flow in each vessel segment. The  $k$  terms are simply a way of splitting up the total volume B  
 255 amongst the  $\eta$  segments. You need  $\eta-1$   $k$  terms to create  $\eta$  vessel segments, where  $B \geq k_1 \geq k_2 \geq$   
 256  $\dots \geq k_{\eta-1}$ .

257 Now we want to find the values of  $k$  that minimise the function  $Q_t(B)$ . Taking the partial derivative of  
 258 the function with respect to any one of the  $k$  variables, termed generically as  $k_\phi$ ;

$$259 \quad (14) \quad \frac{\partial Q_t}{\partial k_\phi} = -\frac{\partial f}{\partial k_\phi}(k_{\phi-1} - k_\phi) + \frac{\partial f}{\partial k_\phi}(k_\phi - k_{\phi+1})$$

260 When  $k_{\phi} = k_1$ , then  $k_{\phi-1} = B$ .

261 To find the minimum or maximum the partial derivative is set equal to 0. Therefore;

262 (15) 
$$\frac{\partial f}{\partial k_{\phi}}(k_{\phi-1} - k_{\phi}) = \frac{\partial f}{\partial k_{\phi}}(k_{\phi} - k_{\phi+1})$$

263 The entire function is either maximised or minimised when all values of  $k$  satisfy the above  
264 formulation. This occurs when all the terms on the right side of Eq. 13 are identical i.e. when the  
265 total volume  $B$  is divided evenly among the  $\eta$  vessel segments. Progressing on to the second  
266 derivative;

267 (16) 
$$\frac{\partial^2 Q_t}{\partial k_{\phi}^2} = \frac{\partial^2 f}{\partial k_{\phi}^2}(k_{\phi-1} - k_{\phi}) + \frac{\partial^2 f}{\partial k_{\phi}^2}(k_{\phi} - k_{\phi+1})$$

268 Since  $k_{\phi-1} - k_{\phi} = k_{\phi} - k_{\phi+1}$  at this maximum/minimum, then;

269 (17) 
$$\frac{\partial^2 Q_t}{\partial k_{\phi}^2} = 2 \frac{\partial^2 f}{\partial k_{\phi}^2}(k_{\phi} - k_{\phi+1})$$

270 The function  $f(k_{\phi} - k_{\phi+1})$  is just the curve from Fig 1. It can be seen that all order derivatives of this  
271 curve will be a similarly shaped curve that also has only positive values. Therefore  $2 \frac{\partial^2 f}{\partial k_{\phi}^2}(k_{\phi} - k_{\phi+1})$   
272 will always be a positive value and  $k_{\phi-1} - k_{\phi} = k_{\phi} - k_{\phi+1}$  must be a local minimum. Total organ  $Q_t$   
273 is therefore minimised when the total volume,  $B$ , of the organ is distributed evenly amongst all  $\eta$   
274 vessel segments.

275 Plotting the curve graphically for Eq. 13 shows it to be u-shaped. We have identified the value for  
276 the minimum. The maximum with respect to any value of  $k_{\phi}$  exists at either end of the curve i.e.  
277 when either  $k_{\phi-1} - k_{\phi} = 0$  or when  $k_{\phi} - k_{\phi+1} = 0$ .

278 If  $k_{\phi-1} - k_{\phi} = 0$ , then the neighbouring terms to the right become;

279 (18) 
$$f(k_{\phi} - k_{\phi+1}) + f(k_{\phi+1} - k_{\phi+2})$$

280 Now to maximise these with respect to  $k_{\phi+1}$  either  $k_{\phi-1} - k_{\phi+1} = 0$  or  $k_{\phi+1} - k_{\phi+2} = 0$ . Let us say  
281 now that  $k_{\phi+1} - k_{\phi+2} = 0$ . The new adjacent pair of terms becomes

282 (19) 
$$f(k_{\phi} - k_{\phi+1}) + f(k_{\phi+1} - k_{\phi+3})$$

283 This can again be maximised with respect to  $k_{\phi+1}$

284 We can continue this exercise in both directions maximising pairs of adjacent  $f()$  terms with respect  
285 to different  $k$  terms until we are left with just one term that contains the entire volume  $B$ . Therefore  
286 total organ  $Q_t$  is maximised when the total volume,  $B$ , of the organ is distributed into just one vessel  
287 segment and the other vessel segments contain zero volume.

288

## 289 Discussion

290 I have demonstrated a model wherein the total flow in a compliant segment of the microcirculation  
291 is dependent on its volume. The total flow represents the mean of both forward and reverse  
292 travelling waves. Total flow in an organ bed is related to the distribution of volume, and therefore  
293 arterial inflow, amongst parallel microvascular segments, as well as total volume. High total flow  
294 results from heterogeneous volume distribution, while low total flow results from homogenous  
295 volume distribution. For volume to be redistributed, arterial inflow into the microvasculature must



296 be redistributed. Therefore a better way to think of the overall findings is that microvascular flow  
297 heterogeneity increases total flow, and vice-versa. Despite a high overall cardiac output, segments of  
298 the microcirculation may receive inadequate flow while others receive excessive flow.

299 This redistribution phenomenon provides a much needed theoretical model that explains the  
300 contradictory and paradoxical associations of the microcirculation and macrocirculation. Clinicians  
301 such as myself have long struggled to understand why patients with elevated cardiac output, warm  
302 peripheries and increased blood flow to all organ beds nevertheless exhibit clear signs of organ  
303 hypoperfusion. Maldistributed flow to the microcirculation has long been recognised, however this  
304 is the first work to suggest that there is a causative association; maldistribution directly induces a  
305 hyperdynamic circulation.

306 The traditional explanation for the hyperdynamic circulation has centred on generalised vasodilation  
307 causing low systemic vascular resistance and therefore reduced load on the heart, increasing its  
308 cardiac output. The generalised vasodilation hypothesis does not have strong grounding (19-20). It  
309 has mostly been inferred from calculating global resistance by taking arterial pressure and dividing  
310 by cardiac output and is at direct odds with microcirculatory observations. It has been demonstrated  
311 in other mathematical work that heterogeneous vessel distribution of a fixed total volume lowers  
312 the overall resistance of a vessel bed (21). Therefore microcirculatory heterogeneity may better  
313 explain the reduced systemic vascular resistance. Adequate circulatory volume is also a factor; in  
314 cases of concurrent hypovolemia patients with septic shock do not become hyperdynamic and  
315 actually develop low cardiac output with increased systemic vascular resistance (3). It can be seen  
316 from Eq. 6 that resistance of a compliant bed falls as its volume increases.

317 Of course, as emphasised, this is the total flow we are discussing. Assuming the ratio of forward to  
318 reverse waves is unchanged, an increase in total flow will increase the net flow (cardiac output),  
319 allowing the creation of a hyperdynamic circulation at sufficient total flow. If however wave  
320 reflections increase, this may not be the case. The Starling curve (22) demonstrates the relationship  
321 between the pressure in the right atrium (x axis) and the flow through it (y-axis) as a function of  
322 increasing cardiac fluid volume. It is curvilinear in nature. At low right atrial pressures relatively large  
323 increases in flow are associated with small increases in right atrial pressure, and at high right atrial  
324 pressures relatively small (or no) increases in flow are associated with high increases in right atrial  
325 pressure.

326 Therefore anything that causes either a rightward shift along the Starling curve or a rightward shift  
327 of the entire curve will increase the right atrial impedance. This will increase wave reflections. In  
328 order for cardiac output to not fall, total flow has to increase, so either the volume of the  
329 microcirculation or its flow heterogeneity has to increase. Excessive exogenous fluid administration  
330 causes a rightward shift along the curve. If the heart cannot respond to the fluid load by increasing  
331 its pumping the extra volume will not be delivered to the microcirculation. Therefore to maintain  
332 cardiac output the microvascular flow heterogeneity must increase. A failing heart, either  
333 endogenous or in response to excessive vasoconstrictor medication will result in a rightward shift of  
334 the entire curve. Again, the volume of the microvasculature cannot be increased in such a situation,  
335 and the microcirculation will become impaired if cardiac output is to be maintained. In either  
336 situation a rise in the central venous pressure without a concomitant rise in cardiac output will  
337 impair microcirculatory function. This provides a hypothetical explanation as to why high central  
338 venous pressures are an independent predictor of organ dysfunction in both sepsis and heart failure.

339 This is one clinical application of the hypothesis of this paper. Traditional therapies for hyperdynamic  
340 septic shock are fluid resuscitation and vasopressor medication. Fluid resuscitation, if the heart is

341 able to deliver the administered fluid into the microcirculation, may increase the volume of the  
342 “low-volume-low-flow” microcirculatory segments, thereby increasing their flow. Vasopressors are  
343 another therapy in use, and it has never been quite clear how they should improve organ function  
344 when they constrict flow to vessel beds. In fact, vasopressors may decrease  $v_0$  of the “oversupplied”  
345 segments, thereby decreasing the volume required for a given flow, and this now excess volume  
346 may be shunted back to the “undersupplied” segments. However if either fluid resuscitation or  
347 vasopressor therapy is excessive and increases central venous pressure without the heart being able  
348 to pump more, then microcirculatory function is impaired, or cardiac output falls. During the  
349 development of sepsis concomitant hypovolemia and reduced microcirculatory volume may  
350 outweigh the effect of microvascular heterogeneity and total flow and cardiac output may be  
351 reduced. Administration of vasopressors may shrink the microvascular volume more than it  
352 decreases  $v_0$  and be insufficient to restore cardiac output. Therefore it is important to monitor both  
353 central venous pressure and indicators of cardiac output during resuscitation.

354 The limitations of this study is that it is theoretical and it would be difficult to develop experimental  
355 protocols to test the hypothesis. The applicability of the mathematics is related to the underlying  
356 assumptions. The non-Newtonian nature of blood may have a large effect than anticipated. There  
357 may be other physiological phenomena present that are not accounted for in the model.

358

359

360

361

362

363

364

365

366

367

368

369

370

371

372

373

374

375

376

377 Disclosures:

378 I have no conflicts of interest or other disclosure to make.

379

380

381

382

383

384

385

386

387

388

389

390

391

392

393

394

395

396

397

398

399

400

401

402

403

404

405

406

407

408 References

409

- 410 1. Kislitsina ON, Rich JD, Wilcox JE, Pham DT, Churyla A, Vorovich EB, et al. Shock - Classification  
411 and Pathophysiological Principles of Therapeutics. *Curr Cardiol Rev.* 2019;15(2):102-113. doi:  
412 10.2174/1573403X15666181212125024. PMID: 30543176; PMCID: PMC6520577.
- 413 2. Hernandez G, Bruhn A, Ince C. Microcirculation in sepsis: new perspectives. *Curr Vasc*  
414 *Pharmacol.* 2013 Mar 1;11(2):161-9. PMID: 23506495.
- 415 3. MacLean LD, Mulligan WG, McLean AP, Duff JH. Patterns of septic shock in man--a detailed  
416 study of 56 patients. *Ann Surg.* 1967 Oct;166(4):543-62. doi: 10.1097/0000658-196710000-  
417 00004. PMID: 6061542; PMCID: PMC1477449.
- 418 4. Russell JA, Rush B, Boyd J. Pathophysiology of Septic Shock. *Crit Care Clin.* 2018 Jan;34(1):43-  
419 61. doi: 10.1016/j.ccc.2017.08.005. PMID: 29149941.
- 420 5. Vincent JL. The International Sepsis Forum's frontiers in sepsis: High cardiac output should  
421 be maintained in severe sepsis. *Crit Care.* 2003 Aug;7(4):276-8. doi: 10.1186/cc2349. Epub  
422 2003 Jul 4. PMID: 12930548
- 423 6. Top AP, Ince C, de Meij N, van Dijk M, Tibboel D. Persistent low microcirculatory vessel  
424 density in nonsurvivors of sepsis in pediatric intensive care. *Crit Care Med.* 2011 Jan;39(1):8-  
425 13.
- 426 7. Rajendram R, Prowle JR. Venous congestion: are we adding insult to kidney injury in sepsis?  
427 *Crit Care.* 2014 Jan 27;18(1):104. doi: 10.1186/cc13709. PMID: 24467922; PMCID:  
428 PMC4055982.
- 429 8. Mullens W, Abrahams Z, Francis GS, Sokos G, Taylor DO, Starling RC, et al. Importance of  
430 venous congestion for worsening of renal function in advanced decompensated heart  
431 failure. *J Am Coll Cardiol* 2009, 53: 589-596. 10.1016/j.jacc.2008.05.068
- 432 9. O'Rourke MF. Wave travel and reflection in the arterial system. *J Hypertens Suppl.* 1999  
433 Dec;17(5):S45-7. PMID: 10706326.
- 434 10. Naishadham K. Transmission Lines. In: Chen W, editors. *The Electrical Engineering*  
435 *Handbook.* Academic Press; 2005. p 525-537. ISBN 9780121709600.
- 436 11. Secomb TW. Mechanics of blood flow in the microcirculation. *Symp Soc Exp Biol.*  
437 1995;49:305-21. PMID: 8571232.
- 438 12. Guyton AC, Lindsey AW, Abernathy B, Richardson T. Venous return at various right atrial  
439 pressures and the normal venous return curve. *Am J Physiol.* 1957 Jun;189(3):609-15. doi:  
440 10.1152/ajplegacy.1957.189.3.609. PMID: 13458395.
- 441 13. Magder S, Famulari G, Gariepy B. Periodicity, time constants of drainage, and the mechanical  
442 determinants of peak cardiac output during exercise. *J Appl Physiol* (1985). 2019 Dec  
443 1;127(6):1611-1619. doi: 10.1152/jappphysiol.00688.2018. Epub 2019 Aug 15. PMID:  
444 31414960.
- 445 14. Pedley, T., Luo, X. Modelling Flow and Oscillations in Collapsible Tubes. *Theoret. Comput.*  
446 *Fluid Dynamics* 10, 277–294 (1998). <https://doi.org/10.1007/s001620050064>
- 447 15. Kozlovsky P, Zaretsky U, Jaffa AJ, Elad D. General tube law for collapsible thin and thick-wall  
448 tubes. *J Biomech.* 2014 Jul 18;47(10):2378-84. doi: 10.1016/j.jbiomech.2014.04.033. Epub  
449 2014 Apr 26. PMID: 24837222.
- 450 16. Secomb TW. Mechanics of blood flow in the microcirculation. *Symp Soc Exp Biol.*  
451 1995;49:305-21. PMID: 8571232.
- 452 17. Alotta G, Bologna E, Failla G, Zingales M. A Fractional Approach to Non-Newtonian Blood  
453 Rheology in Capillary Vessels. *J Peridyn Nonlocal Model.* 2019;1:88–96. doi:10.1007/s42102-  
454 019-00007-9

- 455 18. Kennelly AE. Time Constants for Engineering Purposes in Simple Exponential Transient  
456 Phenomena. Proc Natl Acad Sci U S A. 1924 Nov;10(11):467-73. doi:  
457 10.1073/pnas.10.11.467. PMID: 16586952; PMCID: PMC1085755.
- 458 19. Tucker JJ, Wilson MA, Wead WB, Garrison RN. Microvascular endothelial cell control of  
459 peripheral vascular resistance during sepsis. Arch Surg. 1998 Dec;133(12):1335-42. doi:  
460 10.1001/archsurg.133.12.1335. PMID: 9865652.
- 461 20. Tymi K, Yu J, McCormack DG. Capillary and arteriolar responses to local vasodilators are  
462 impaired in a rat model of sepsis. J Appl Physiol (1985). 1998 Mar;84(3):837-44. doi:  
463 10.1152/jappl.1998.84.3.837. PMID: 9480941.
- 464 21. Rosenberg E. On deriving Murray's law from constrained minimization of flow resistance. J  
465 Theor Biol. 2021 Mar 7;512:110563. doi: 10.1016/j.jtbi.2020.110563. Epub 2020 Dec 24.  
466 PMID: 33359240.
- 467 22. Berlin DA, Bakker J. Starling curves and central venous pressure. Crit Care. 2015 Feb  
468 16;19(1):55. doi: 10.1186/s13054-015-0776-1. PMID: 25880040; PMCID: PMC4329649.

470

471

472

473

474

475

476

477

478

479

480

481

482

483

484

485

486

487

488

489

490

491

492

493

494

495

496

497

498

499

500

501  
502

Figures

Figure 1. Flow vs volume of a compliant tube segment

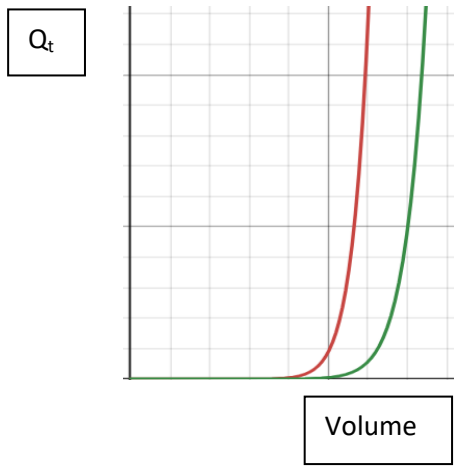

Source: https://medrxiv.org/content/10.1101/2024.07.22.24310841v1.full.pdf
